# Supplementary material for: Widening rural–urban gap in life expectancy in China since COVID-19
Source: PubMed Central journal article supplement — BMJ Glob Health. 2023 Sep 19;8(9):e012646. doi: 10.1136/bmjgh-2023-012646 (PMC10510900; doi:10.1136/bmjgh-2023-012646), 2023-09-19
Supplement: bmjgh-2023-012646supp001.pdf [file bmjgh-2023-012646supp001.pdf]

## Supplementary materials to “The widening rural-urban gap in life expectancy since COVID-19 ”

Shasha Han, PhD <sup>1,2,3\*#</sup> Binbin Su, PhD <sup>1\*</sup> Yihao Zhao, PhD <sup>1</sup> Chen Chen, PhD <sup>1</sup> Xiaoying Zheng, PhD <sup>1#</sup>

1. School of Population Medicine and Public Health, Chinese Academy of Medical Sciences & Peking Union Medical College, Beijing, China
2. State Key Laboratory of Respiratory Health and Multimorbidity, Beijing, China
3. Key Laboratory of Pathogen Infection Prevention and Control (Peking Union Medical College), Ministry of Education, Beijing, China

\* These authors contributed equally.

### # Corresponding Authors:

Shasha Han, PhD, Assistant Prof.

School of Population Medicine and Public Health

Chinese Academy of Medical Sciences & Peking Union Medical College

Beijing, P. R. China. 100730

[hanshasha@pumc.edu.cn](mailto:hanshasha@pumc.edu.cn)

Xiaoying Zheng, PhD, Prof.

School of Population Medicine and Public Health

Chinese Academy of Medical Sciences & Peking Union Medical College

Beijing, P. R. China. 100730

[zhengxiaoying@sph.pumc.edu.cn](mailto:zhengxiaoying@sph.pumc.edu.cn)

## Technical details

We calculated life expectancy from 1987 to 2021 using annual period life tables via standard demographic techniques<sup>1</sup> for rural and urban residences separately. All-age rural-urban gaps were estimated as the life expectancies of the urban population minus those of the rural population. Using the Arriaga decomposition technique,<sup>2</sup> we attributed annual changes in the gaps to changes in age-specific mortality, and attributed annual gaps to all-cause mortality. Additionally, we calculated excess rural-urban gaps for 2003, 2010, 2020, and 2021 defined as observed gap minus expected gap based on a continuation of outbreak trends. We estimated the expected rural-urban gap using the Lee–Carter forecasts<sup>3</sup> of age- and sex-specific mortality over the five years before the start of the outbreaks.

We describe the Lee-Carter (LC) method and Arriaga decomposition method below.

Let  $m_{x,t}$  be the central death rate at age  $x$  in year  $t$ . The LC model can be expressed as:

$$\ln(m_{x,t}) = a_x + b_x k_t + \varepsilon_{x,t}$$

where  $a_x$  is the general shape of mortality by age, and  $k$  is a time index of the general level of mortality. The parameter  $b_x$  describes the extent to which mortality at age  $x$  changes given the overall temporal change in the general level of mortality: greater values of  $b_x$  are associated with faster mortality change. The error term  $\varepsilon_{x,t}$  reflects residual age-specific temporal influences not captured by the model, and is assumed to have zero mean and variance  $\sigma_\varepsilon^2$ . By modelling logged rates, the fitted and forecast rates (obtained by exponentiation) are constrained to be positive. The logarithmic transformation also serves to counter the heteroscedasticity in the observed rates.

Let  $e_0^u - e_0^r$  denote the expectation of life at birth for rural population  $u$  and urban population  $r$ ,  $e_x^i$  expectation of life at age  $x$  in population  $i$ .  $l_x^i$  number of survivors to age  $x$  in population  $i$ ,  ${}_nL_x^i$  person years of life contributed in the age group  $(x, x + n)$  in population  $i$ . Arriaga decomposition formulates the differences in the expectation of life at birth  $e_0^u - e_0^r$  due to

differences in age-specific death rates as the sum of direct effect of age  $x$  ( $DE_x$ ) and the indirect effect of age  $x$ , where the direct effect ( $DE_x$ ) of age group  $(x, x + n)$  is

$$DE_x = l_x^u \left( \frac{nL_x^r}{l_x^r} - \frac{nL_x^u}{l_x^u} \right)$$

and the indirect effect ( $IDE_x$ ) of age group  $(x, x + n)$  is

$$IDE_x = \left( l_x^u \frac{l_{x+n}^r}{l_x^r} - l_{x+n}^u \right) e_{x+n}^r.$$

We further decompose the age-specific effects can into the age- and cause-specific effects using the weights, which are calculated as the proportion of the difference in the cause-specific mortality rates as a share of the total mortality difference in the specific age interval.

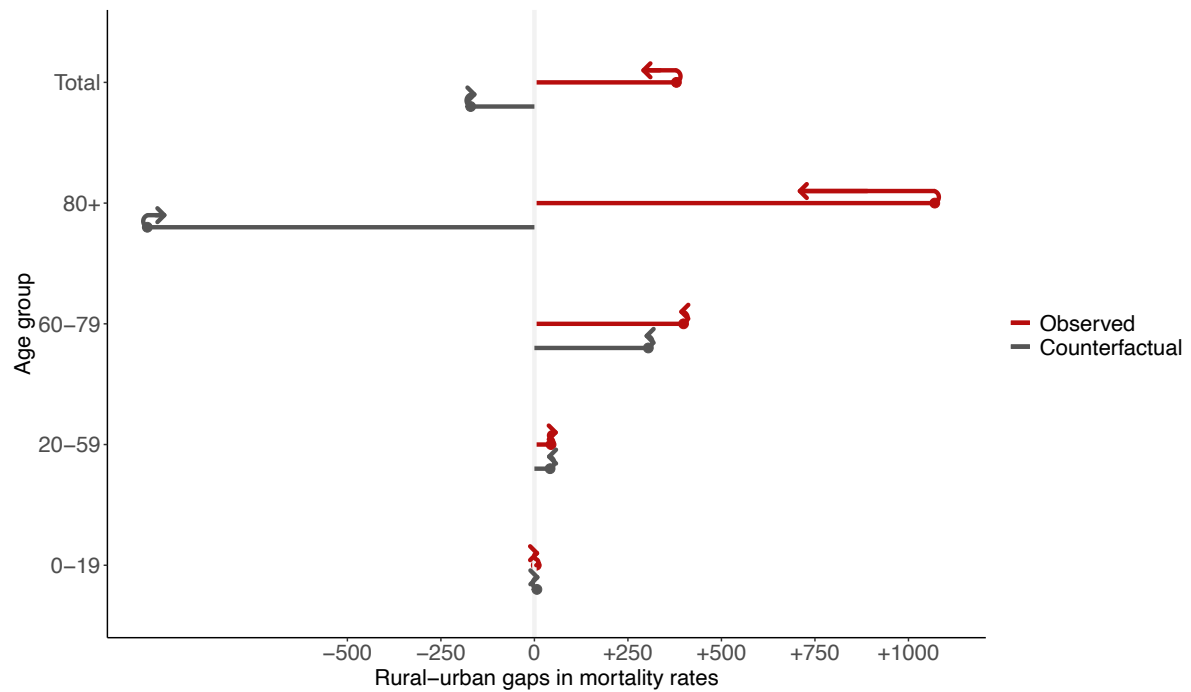

**eFigure 1 Rural-urban gap in mortality rates during the pandemic.** The position of the point indicates the rural-urban gap in mortality rates in a given age group, defined as the mortality rates of rural populations minus that of urban populations, in 2020. The position of the arrowhead indicates the gap in 2021. Red lines represent the gap in the real-world scenario, and the grey lines the gap in the counterfactual scenarios without pandemics. Negative values suggest a diminished rural-urban gap in the age group.

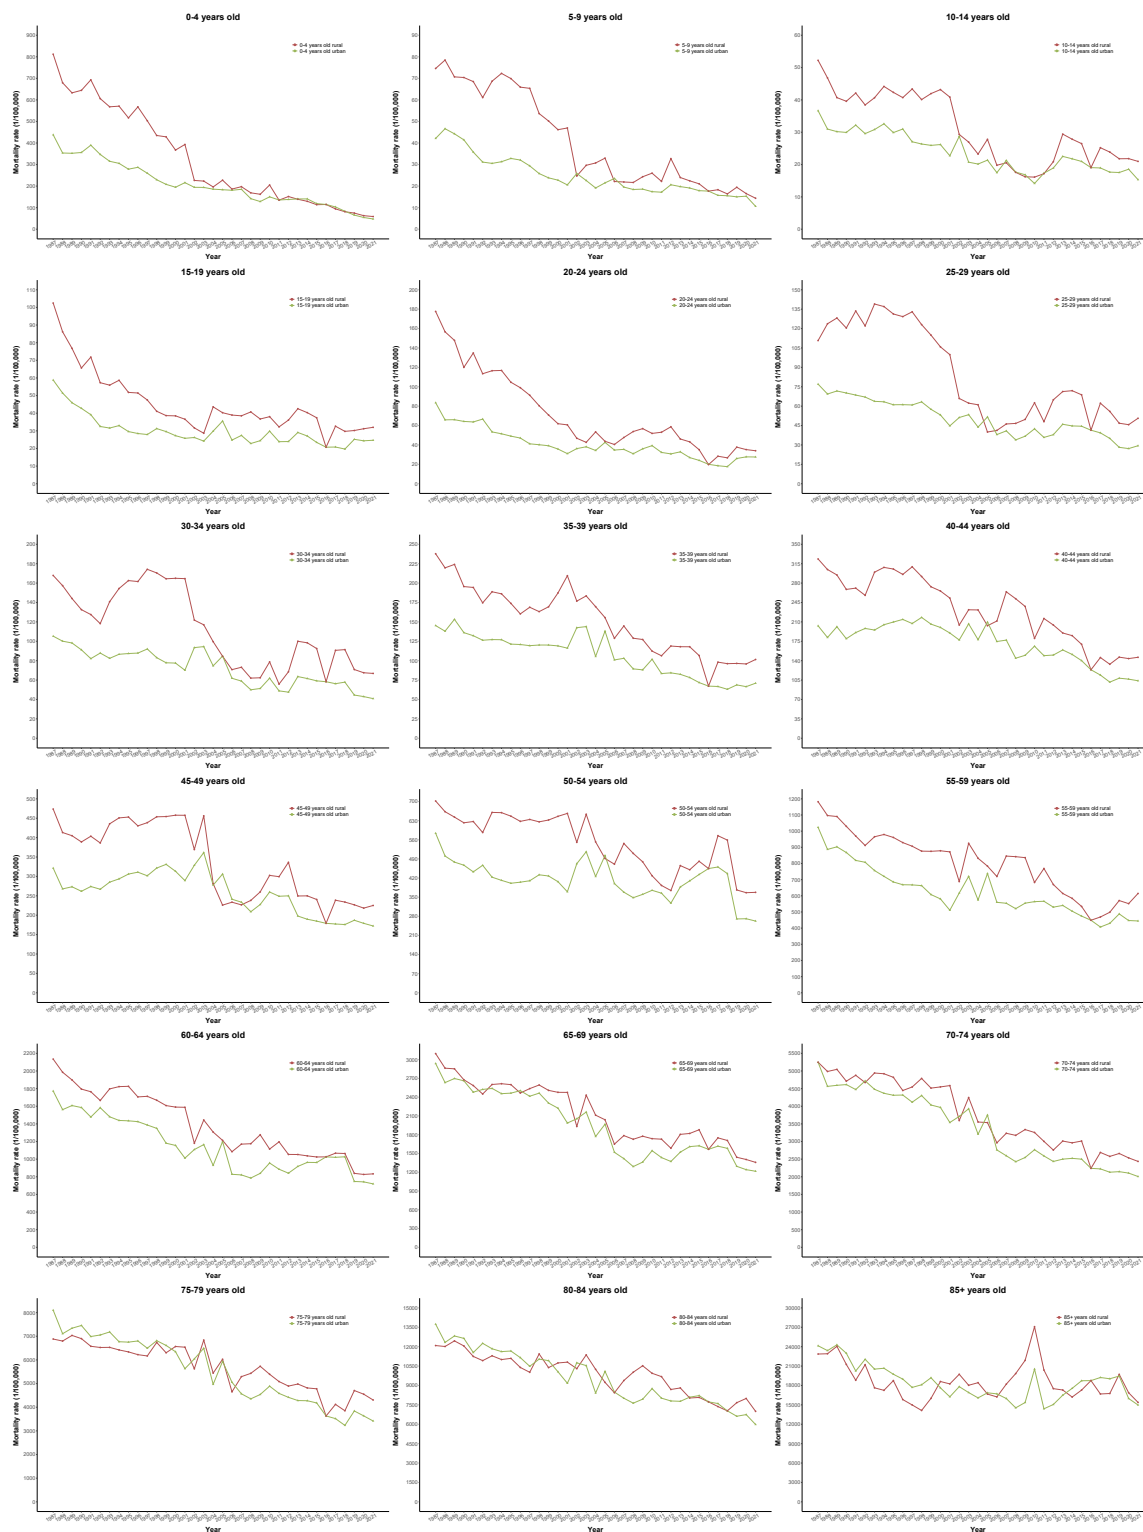

**eFigure 2 Mortality rates in China from 1987 to 2021, broken down by five-year age group.**

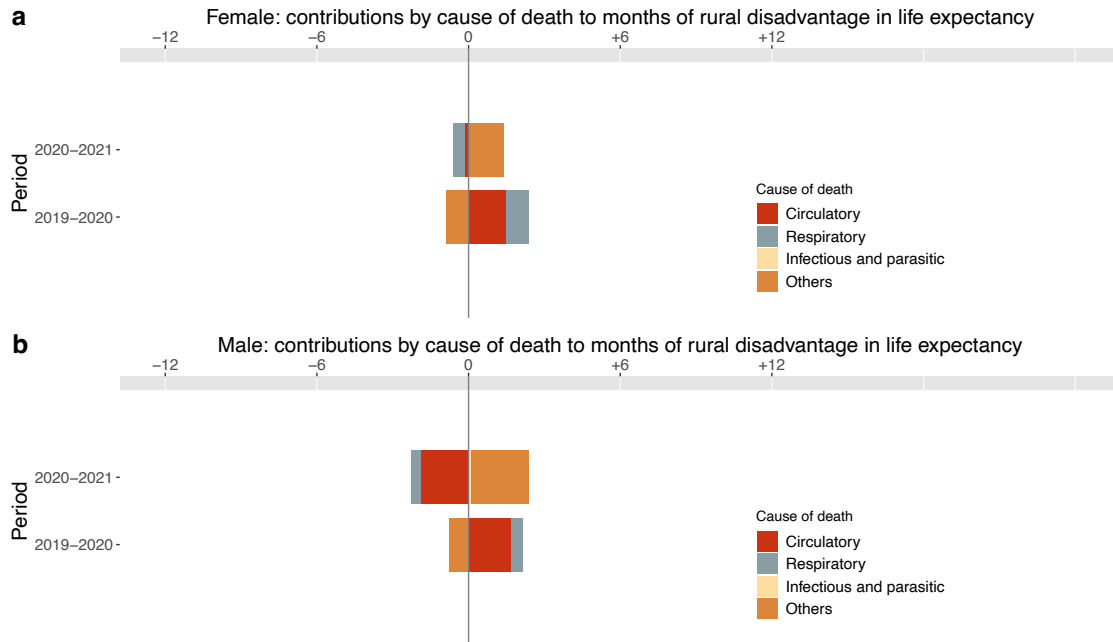

**eFigure 3 Contributions by cause of death to changes in months of rural-urban gaps in life expectancy since 1987 by sex, using the contour method.**

**Extended Data Table 1 Years of change in life expectancy by geographical area**

| Year | Rural mean | Rural 95% CI   | Urban mean | Urban 95% CI   |
|------|------------|----------------|------------|----------------|
| 2021 | +8.4       | (+5.6, +11.9)  | +9.7       | (+6.1, +12.8)  |
| 2020 | +10.5      | (+7.8, +13.6)  | +14.8      | (+11.3, +17.8) |
| 2019 | -6.3       | (-9.1, -3.4)   | +5.3       | (+2.3, +8.0)   |
| 2018 | +3.9       | (+1.2, +7.0)   | +5.3       | (+2.4, +8.4)   |
| 2017 | -5.5       | (-8.8, -3.2)   | +0.6       | (-2.8, +3.6)   |
| 2016 | +15.8      | (+12.8, +18.7) | +5.4       | (+3.0, +8.1)   |
| 2015 | -1.4       | (-4.2, +1.0)   | -1.2       | (-3.5, +2.0)   |
| 2014 | +7.0       | (+4.3, +10.1)  | -4.4       | (-7.0, -1.8)   |
| 2013 | -2.0       | (-4.4, +0.0)   | -8.9       | (-12.4, -6.2)  |
| 2012 | +10.7      | (+8.0, +13.0)  | +1.0       | (-2.0, +5.2)   |
| 2011 | +14.1      | (+12.4, +16.7) | +26.0      | (+23.0, +28.3) |
| 2010 | -1.6       | (-3.6, +0.4)   | -25.0      | (-27.9, -22.5) |
| 2009 | -6.3       | (-8.6, -3.6)   | -7.8       | (-11.0, -4.1)  |
| 2008 | -1.7       | (-4.2, +0.3)   | +15.3      | (+12.3, +18.5) |
| 2007 | -17.6      | (-20.5, -14.5) | +7.2       | (+4.8, +10.0)  |
| 2006 | +18.7      | (+15.6, +20.8) | +26.8      | (+24.0, +29.3) |
| 2005 | +8.4       | (+6.2, +10.7)  | -21.3      | (-23.3, -18.6) |
| 2004 | +17.4      | (+15.8, +19.2) | +26.5      | (+24.4, +29.0) |
| 2003 | -15.8      | (-18.2, -14.0) | -3.9       | (-6.4, -1.7)   |
| 2002 | +29.9      | (+28.2, +32.3) | -14.4      | (-17.0, -12.2) |
| 2001 | -0.6       | (-2.6, +1.9)   | +14.1      | (+12.0, +16.3) |
| 2000 | -3.2       | (-5.1, -1.3)   | +7.9       | (+5.8, +10.2)  |
| 1999 | +1.4       | (-1.0, +3.9)   | +4.8       | (+2.5, +6.9)   |
| 1998 | +3.0       | (+0.4, +5.0)   | -2.4       | (-5.3, -0.7)   |
| 1997 | +3.9       | (+1.8, +6.5)   | +7.5       | (+5.8, +9.7)   |
| 1996 | +9.5       | (+7.8, +11.4)  | +1.1       | (-0.8, +3.2)   |
| 1995 | +1.7       | (-0.1, +4.2)   | +3.3       | (+1.7, +5.3)   |
| 1994 | -0.2       | (-2.3, +1.9)   | +2.8       | (+1.1, +5.0)   |
| 1993 | -1.5       | (-3.4, +0.8)   | +6.5       | (+4.8, +8.2)   |

---

|      |       |               |       |                |
|------|-------|---------------|-------|----------------|
| 1992 | +7.5  | (+5.2, +9.5)  | -3.1  | (-5.0, -1.2)   |
| 1991 | +2.1  | (-0.2, +4.5)  | +7.3  | (+5.6, +9.3)   |
| 1990 | +9.5  | (+7.5, +11.3) | +3.3  | (+1.7, +4.9)   |
| 1989 | +2.4  | (+0.6, +4.3)  | -2.9  | (-4.5, -1.6)   |
| 1988 | +11.3 | (-7.1, -3.2)  | +18.2 | (+14.9, +18.4) |

---



**Extended Data Table 2 Contributions by age to months of excess life expectancy in recent epidemics by geographical area**

| Year | Age   |            |                |            |                |
|------|-------|------------|----------------|------------|----------------|
|      | group | Rural mean | Rural 95% CI   | Urban mean | Urban 95% CI   |
| 2021 | 0-19  | +0.5       | (+0.3, +0.7)   | +0.3       | (+0.1, +0.5)   |
| 2021 | 20-59 | -1.3       | (-1.9, -0.4)   | +1.1       | (+0.5, +1.7)   |
| 2021 | 60-79 | -0.2       | (-1.9, +1.7)   | +2.8       | (+1.4, +4.4)   |
| 2021 | 80+   | +8.2       | (+5.2, +11.3)  | +20.6      | (+16.3, +24.9) |
| 2021 | Total | +7.1       | (+3.6, +11.3)  | +24.9      | (+20.4, +29.1) |
| 2020 | 0-19  | +0.4       | (+0.3, +0.6)   | +0.1       | (-0.1, +0.3)   |
| 2020 | 20-59 | +1.0       | (+0.5, +1.7)   | +1.4       | (+1.0, +1.9)   |
| 2020 | 60-79 | -0.4       | (-1.7, +1.3)   | +2.1       | (+0.9, +3.4)   |
| 2020 | 80+   | -0.7       | (-4.0, +1.8)   | +12.9      | (+8.8, +15.7)  |
| 2020 | Total | +0.3       | (-3.4, +4.1)   | +16.5      | (+12.4, +20.6) |
| 2010 | 0-19  | -2.3       | (-2.5, -1.9)   | -1.0       | (-1.2, -0.6)   |
| 2010 | 20-59 | +2.4       | (+1.6, +3.2)   | -6.1       | (-6.7, -5.6)   |
| 2010 | 60-79 | -2.4       | (-3.8, -1.0)   | -12.8      | (-14.3, -11.8) |
| 2010 | 80+   | -10.0      | (-11.9, -8.1)  | -26.9      | (-30.9, -23.1) |
| 2010 | Total | -12.2      | (-14.6, -9.7)  | -46.9      | (-51.3, -43.1) |
| 2003 | 0-19  | +8.7       | (-0.7, +12.6)  | +0.1       | (-0.4, +0.7)   |
| 2003 | 20-59 | +3.2       | (+1.3, +4.4)   | -10.1      | (-10.7, -9.5)  |
| 2003 | 60-79 | +2.1       | (-0.7, +3.8)   | -12.5      | (-13.9, -10.7) |
| 2003 | 80+   | -0.2       | (-6.4, +13.7)  | -8.0       | (-10.7, -5.1)  |
| 2003 | Total | +13.8      | (+11.4, +17.5) | -30.4      | (-34.3, -26.3) |

**Extended Data Table 3 Contributions by age to months of the excess rural-urban gap in recent epidemics**

| Year | Age group | Female mean | Female 95% CI  | Male mean | Male 95% CI    |
|------|-----------|-------------|----------------|-----------|----------------|
| 2003 | 0-19      | -9.9        | (-11.8, -3.7)  | -3.8      | (-12.6, -10.2) |
| 2003 | 20-59     | -12.7       | (-13.8, -11.3) | -14.7     | (-15.8, -13.7) |
| 2003 | 60-79     | -13.1       | (-17.2, -13.4) | -14.5     | (-16.4, -12.2) |
| 2003 | 80+       | -12.0       | (-25.8, -8.4)  | -2.8      | (-5.4, -0.8)   |
| 2003 | Total     | -47.7       | (-57.4, -47.4) | -35.8     | (-46.6, -39.8) |
| 2010 | 0-19      | +0.4        | (+0.2, +1.0)   | +1.6      | (+1.4, +2.3)   |
| 2010 | 20-59     | -7.8        | (-8.5, -7.2)   | -9.9      | (-11.1, -8.9)  |
| 2010 | 60-79     | -6.9        | (-8.5, -5.0)   | -17.2     | (-19.6, -15.1) |
| 2010 | 80+       | -12.6       | (-17.7, -8.3)  | -7.3      | (-9.2, -5.0)   |
| 2010 | Total     | -27.0       | (-32.4, -21.6) | -32.8     | (-36.4, -28.7) |
| 2020 | 0-19      | +0.3        | (-0.0, +0.4)   | +0.3      | (+0.0, +0.5)   |
| 2020 | 20-59     | -0.8        | (-1.4, -0.2)   | -1.3      | (-2.4, -0.0)   |
| 2020 | 60-79     | +1.9        | (-0.3, +3.3)   | +3.3      | (+1.2, +5.5)   |
| 2020 | 80+       | +18.9       | (+12.3, +24.2) | +10.8     | (+7.0, +14.9)  |
| 2020 | Total     | +20.2       | (+12.9, +26.3) | +13.1     | (+8.4, +17.8)  |
| 2021 | 0-19      | +0.5        | (+0.2, +0.7)   | +0.8      | (+0.4, +1.0)   |
| 2021 | 20-59     | +0.1        | (-0.6, +0.7)   | +0.2      | (-1.1, +1.4)   |
| 2021 | 60-79     | +2.7        | (+0.4, +4.6)   | +3.4      | (+1.0, +6.1)   |
| 2021 | 80+       | +18.8       | (+12.1, +27.1) | +9.6      | (+5.0, +13.5)  |
| 2021 | Total     | +22.1       | (+15.3, +29.5) | +14.0     | (+8.2, +18.8)  |

**Extended Data Table 4 Months of rural-urban gaps in life expectancy since 1987**

| Year | Population |                   | Female |                |           |                |
|------|------------|-------------------|--------|----------------|-----------|----------------|
|      | mean       | Population 95% CI | mean   | Female 95% CI  | Male mean | Male 95% CI    |
| 2021 | +23.7      | (+19.6, +26.7)    | +21.2  | (+17.4, +26.1) | +24.9     | (+21.9, +27.0) |
| 2020 | +22.7      | (+19.6, +25.8)    | +20.4  | (+16.1, +24.4) | +24.5     | (+21.9, +26.8) |
| 2019 | +19.2      | (+16.4, +22.2)    | +16.5  | (+12.7, +19.3) | +21.4     | (+19.7, +23.9) |
| 2018 | +7.6       | (+5.0, +10.5)     | +2.0   | (-1.3, +5.3)   | +12.5     | (+10.3, +14.9) |
| 2017 | +6.4       | (+3.5, +9.1)      | +0.3   | (-2.8, +4.3)   | +11.5     | (+8.6, +13.5)  |
| 2016 | -0.0       | (-2.6, +3.2)      | +0.6   | (-3.9, +4.1)   | +11.5     | (+9.1, +14.2)  |
| 2015 | +10.3      | (+7.8, +13.1)     | +7.1   | (+3.1, +9.9)   | +12.6     | (+10.3, +15.3) |
| 2014 | +10.0      | (+6.4, +13.0)     | +4.4   | (+1.6, +7.5)   | +14.3     | (+11.9, +16.4) |
| 2013 | +21.2      | (+18.9, +24.4)    | +18.0  | (+14.5, +21.2) | +23.2     | (+21.0, +25.2) |
| 2012 | +27.8      | (+25.5, +31.3)    | +24.3  | (+20.0, +27.4) | +30.3     | (+28.3, +32.7) |
| 2011 | +36.9      | (+33.8, +39.8)    | +32.6  | (+29.1, +36.2) | +38.7     | (+36.3, +40.9) |
| 2010 | +25.9      | (+23.8, +27.9)    | +21.8  | (+19.4, +24.9) | +29.0     | (+27.2, +30.6) |
| 2009 | +47.1      | (+44.7, +49.8)    | +42.2  | (+39.0, +45.3) | +49.5     | (+47.0, +51.2) |
| 2008 | +48.5      | (+46.1, +50.9)    | +42.0  | (+39.2, +45.5) | +52.7     | (+50.4, +54.7) |
| 2007 | +32.2      | (+29.6, +34.6)    | +29.9  | (+27.6, +33.2) | +33.0     | (+31.1, +34.9) |
| 2006 | +7.8       | (+5.6, +10.6)     | +3.9   | (+1.1, +7.8)   | +11.7     | (+9.5, +13.7)  |
| 2005 | -0.2       | (-2.4, +2.6)      | +8.5   | (+7.7, +13.5)  | -13.5     | (-14.0, -9.9)  |
| 2004 | +29.4      | (+27.1, +31.7)    | +26.5  | (+23.5, +29.5) | +30.8     | (+28.9, +32.5) |
| 2003 | +20.0      | (+17.9, +21.9)    | +20.5  | (+13.5, +18.8) | +19.8     | (+18.0, +21.3) |
| 2002 | +8.3       | (+5.8, +10.4)     | +8.9   | (+5.8, +11.1)  | +8.4      | (+21.9, +25.4) |
| 2001 | +51.7      | (+49.8, +54.6)    | +55.2  | (+52.9, +57.7) | +46.1     | (+49.9, +53.6) |
| 2000 | +37.3      | (+35.4, +39.3)    | +36.8  | (+34.0, +39.3) | +37.0     | (+35.3, +38.8) |
| 1999 | +26.4      | (+24.4, +28.7)    | +25.1  | (+23.0, +27.8) | +27.0     | (+24.8, +28.6) |
| 1998 | +23.3      | (+21.0, +25.3)    | +5.6   | (+3.1, +8.6)   | +37.7     | (+36.7, +40.2) |
| 1997 | +28.1      | (+26.2, +30.4)    | +28.6  | (+25.8, +31.8) | +27.4     | (+24.9, +29.5) |
| 1996 | +24.6      | (+22.6, +26.9)    | +20.4  | (+17.5, +22.0) | +28.6     | (+26.5, +30.4) |
| 1995 | +33.2      | (+31.2, +35.1)    | +29.2  | (+26.5, +30.9) | +36.4     | (+34.4, +38.3) |
| 1994 | +31.7      | (+29.7, +33.4)    | +27.9  | (+25.8, +30.1) | +35.2     | (+46.9, +50.7) |

|      |       |                |       |                |       |                |
|------|-------|----------------|-------|----------------|-------|----------------|
| 1993 | +28.7 | (+27.0, +30.2) | +24.4 | (+22.1, +26.7) | +32.2 | (+30.1, +33.8) |
| 1992 | +20.5 | (+17.9, +22.4) | +19.8 | (+17.8, +21.6) | +32.3 | (+30.2, +33.6) |
| 1991 | +31.0 | (+28.8, +33.0) | +29.3 | (+27.0, +31.8) | +32.8 | (+31.0, +34.8) |
| 1990 | +25.9 | (+23.7, +27.8) | +22.5 | (+20.7, +24.5) | +28.6 | (+24.6, +28.0) |
| 1989 | +32.2 | (+30.1, +34.1) | +30.6 | (+28.9, +33.3) | +34.0 | (+32.8, +35.8) |
| 1988 | +37.5 | (+35.9, +39.3) | +37.6 | (+35.2, +39.5) | +38.4 | (+38.1, +41.8) |
| 1987 | +30.6 | (+14.1, +17.9) | +27.0 | (+25.2, +29.1) | +52.6 | (+21.9, +26.2) |

**Extended Data Table 5 Regression results on the rural-urban gap in life expectancy by the gap in public health expenditure**

|                                               | Estimate | Standard error            | t value | Pr(> t ) |
|-----------------------------------------------|----------|---------------------------|---------|----------|
| <b>Age &lt; 60</b>                            |          |                           |         |          |
| (Intercept)                                   | 16.726   | 0.911                     | 18.370  | < 2e-16  |
| Rural-urban gaps in public health expenditure | 1.549    | 0.512                     | 3.028   | 0.003    |
| Year                                          | -0.501   | 0.048                     | -10.338 | 1.64e-15 |
| Multiple R-squared: 0.616,                    |          | Adjusted R-squared: 0.604 |         |          |
| <b>Age ≥ 60</b>                               |          |                           |         |          |
| (Intercept)                                   | 0.325    | 1.483                     | 0.219   | 0.827    |
| Rural-urban gaps in public health expenditure | 0.836    | 2.248                     | 0.373   | 0.711    |
| Year                                          | 0.199    | 0.076                     | 2.570   | 0.012    |
| Multiple R-squared: 0.107,                    |          | Adjusted R-squared: 0.080 |         |          |

**References:**

1. Chiang CL. *Life Table and Mortality Analysis*. World Health Organization; 1978.
2. Arriaga EE. Measuring and explaining the change in life expectancies. *Demography*. 1984;21(1):83-96.
3. Lee RD, Carter LR. Modeling and Forecasting U.S. Mortality. *Journal of the American Statistical Association*. 2012;87(419):659-671.
